# Supplementary material for: Behavioral and Network Origins of Wealth Inequality: Insights from a Virtual World
Source: PLOS journal article supplement (doi:10.1371/journal.pone.0103503), 2014-08-25
Supplement: S8 (10.1371/journal.pone.0103503.s008) [file journal.pone.0103503.s008]

## Text S1. Definition of Network Properties.

### S1.1 Directed and Undirected Networks

A network  $\mathcal{G}$ , called graph in mathematics, consists of a set  $\mathcal{N}$  of *nodes*  $n_i$  and a set  $\mathcal{L}$  of *links* connecting these nodes:  $\mathcal{G} := (\mathcal{N}, \mathcal{L})$  [1–3]. In a directed network, links are ordered pairs:  $\mathcal{L} \ni l_{ij} := (n_i, n_j)$  is a link from node  $n_i$  to node  $n_j$ . In an undirected network, links are unordered pairs of nodes:  $\mathcal{L}_{\text{undir}} \ni l_{ij} := \{n_i, n_j\}$ . Here, a node represents a player in the game, while a link represents an interaction between two players. For each of the interaction types we studied, we produce a separate network, denoted by a superscript on the associated quantities. The (directed) links are constructed in the following way:

$l_{ij} \in \mathcal{L}^{\text{trade}}$  if player  $i$  has traded with a building of player  $j$ ,

$l_{ij} \in \mathcal{L}^{\text{comm.}}$  if a message has been sent from player  $i$  to player  $j$ ,

$l_{ij} \in \mathcal{L}^{\text{friend}}$  if player  $i$  has marked player  $j$  as friend,

$l_{ij} \in \mathcal{L}^{\text{enemy}}$  if player  $i$  has marked player  $j$  as enemy.

The *symmetrization*  $\mathcal{G}_{\text{undir}} = (\mathcal{N}, \mathcal{L}_{\text{undir}})$  of a directed network  $\mathcal{G} = (\mathcal{N}, \mathcal{L})$  is constructed in the following way: Starting with  $\mathcal{G}_{\text{undir},0} = (\mathcal{N}, \mathcal{L}_{\text{undir},0})$ , where  $\mathcal{L}_{\text{undir},0} = \emptyset$ , a link  $l_{ij}$  is added to  $\mathcal{L}_{\text{undir},0}$  if  $l_{ij} \in \mathcal{L}$  or if  $l_{ji} \in \mathcal{L}$ .

### S1.2 Degree

In an undirected network, the *degree*  $k_{\text{undir},i}$  of  $n_i$  is the number of other nodes  $n_j$ , for which the link  $l_{ij}$  is present in the network,  $k_{\text{undir},i} := \#\{n_j : l_{ij} \in \mathcal{L}_{\text{undir}}\}$  (where  $\#\{\dots\}$  means the cardinality, i.e. the number of elements of the set).  $\mathcal{N}_i := \{n_j \in \mathcal{N} : l_{ij} \in \mathcal{L}_{\text{undir}}\}$  is called the set of (nearest) *neighbors* of node  $n_i$ . In a directed network, there are two degrees: The *indegree*  $k_{\text{in},i}$  of node  $n_i$  is the number of other nodes  $n_j$ , from which a link points to node  $n_i$  in the network,  $k_{\text{in},i} := \#\{n_j : l_{ji} \in \mathcal{L}\}$ . Accordingly, the *outdegree*  $k_{\text{out},i}$  of node  $n_i$  is the number of other nodes  $n_j$ , to which a link points from node  $n_i$  in the network,  $k_{\text{out},i} := \#\{n_j : l_{ij} \in \mathcal{L}\}$ .

### S1.3 Clustering Coefficient

In an undirected network, the *clustering coefficient*  $C_i$  of node  $n_i$  is the ratio of pairs of neighbors of  $n_i$  that are connected to the number of all pairs of neighbors of  $n_i$ ,

$$C_i := \frac{\#\{l_{jk} \in \mathcal{L} : n_j \in \mathcal{N}_i \wedge n_k \in \mathcal{N}_i\}}{\frac{1}{2}k_i(k_i - 1)} .$$

Clustering coefficients have been calculated using the function ‘`clustercoeffs`’ from the package ‘`gaimc`’ by David Gleich<sup>1</sup>.

### S1.4 Nearest-Neighbor Degree

In an undirected network, the *nearest-neighbor degree*  $k_{\text{nn},i}$  of node  $n_i$  is the average (undirected) degree of its neighbors,

$$k_{\text{nn},i} := \langle k_{\text{undir},j} \rangle_{n_j \in \mathcal{N}_i} .$$

---

<sup>1</sup>available at <https://github.com/dgleich/gaimc>

## References

1. Wasserman S, Faust K (1994) Social Network Analysis: Methods and Applications. Cambridge University Press.
2. Dorogovtsev S, Mendes J (2003) Evolution of Networks: From Biological Nets to the Internet and WWW. Oxford: Oxford University Press.
3. Newman MEJ (2010) Networks: an Introduction. Oxford: Oxford University Press.
